# Supplementary material for: Cobalt doped titania-carbon nanosheets with induced oxygen vacancies for photocatalytic degradation of uranium complexes in radioactive wastes
Source: Royal Society of Chemistry journal article supplement (doi:10.1039/d2na00467d), 2022-01-01
Supplement: d2na00467d1.pdf [file d2na00467d1.pdf]

1 *Supporting information*

2 **Cobalt Doped Titania-Carbon Nanosheets with Induced**

3 **Oxygen Vacancies for Photocatalytic Degradation of**

4 **Complex Radioactive Waste**

5 **Islam G. Alhindawy <sup>a</sup>, Hamed I. Mira <sup>a</sup>, Ahmed O. Youssef <sup>b</sup>, S. M. Abdelwahab <sup>b</sup>, Ahmed A. Zaher <sup>c</sup>, Waleed**

6 **A. El-Said <sup>d,e</sup>, Emad A. Elshehy <sup>a</sup>, and Amr M. Abdelkader <sup>f,\*</sup>**

7 <sup>a</sup>Nuclear Materials Authority, El Maadi, Cairo, Egypt

8 <sup>b</sup>Department of Chemistry, Faculty of Science, Ain Shams University, Cairo, Egypt

9 <sup>c</sup>Department of Chemistry, Faculty of Science, Mansoura University, Elmansoura, Egypt

10 <sup>d</sup>Department of Chemistry, Faculty of Science, Assiut University, Assiut, 71516, Egypt

11 <sup>e</sup>University of Jeddah, College of Science, Department of Chemistry, P.O. Box 80327, Jeddah 21589,  
12 Saudi Arabia

13 <sup>f</sup>Department of Engineering, Bournemouth University, Talbot Campus, Fern Barrow, Poole, BH12  
14 5BB, United Kingdom.  
15

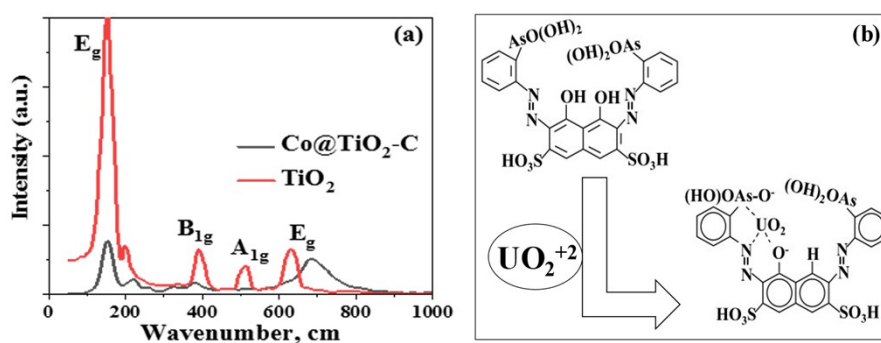

16

17 **Fig. S1** (a) Raman spectrum of TiO<sub>2</sub> and Co@TiO<sub>2</sub>-C, (b) the structure of arsenazo3 [ARZ3]

18 and uranium/arsenaso3 [U(VI)-ARZ3] complex.

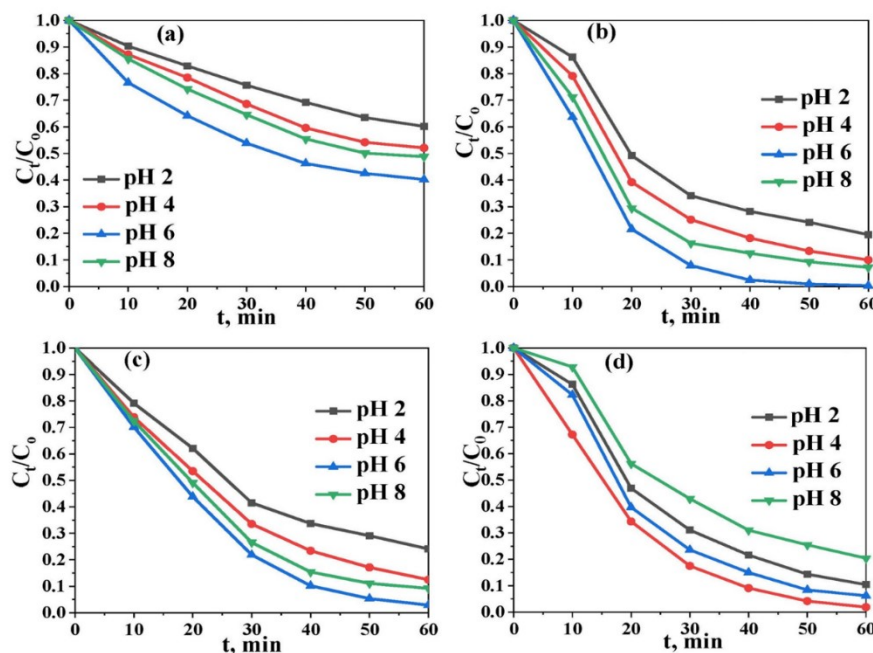

19

20 **Fig. S2** The photocatalytic removal data using Co@TiO<sub>2</sub>-C at varied pH values over a period  
 21 of 60 min (v= 10 ml, m= 10mg) (a) 100 mgL<sup>-1</sup> U(VI) aqueous solution, (b) 100 mgL<sup>-1</sup> U(VI) in  
 22 aqueous solution (10% ethanol), (c) 100 mgL<sup>-1</sup> U(VI) + 50 mgL<sup>-1</sup> arsenazo 3 and (d) 50 mgL<sup>-1</sup>  
 23 Arsenazo 3 in aqueous solution.

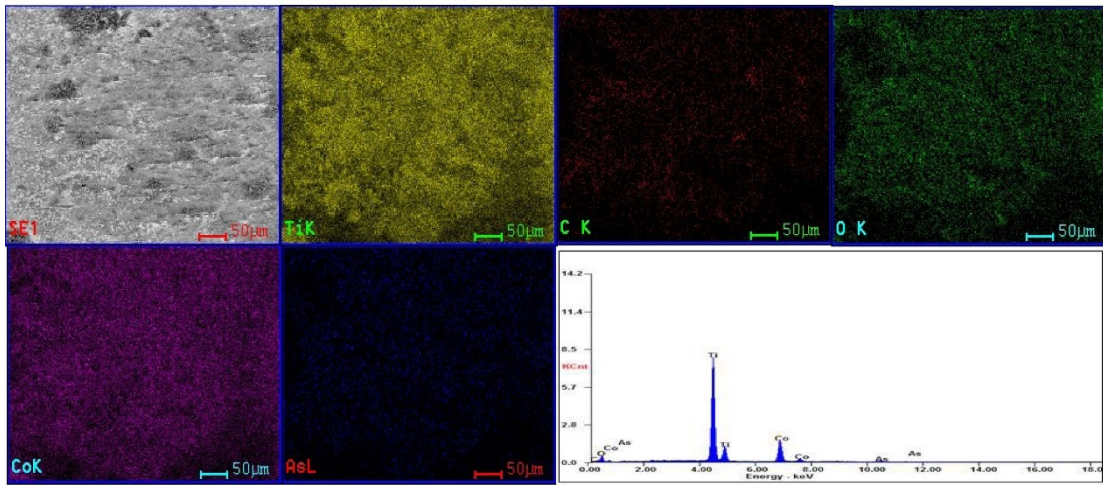

24

25 **Fig. S3** SEM, EdX and element mapping for ARZ3 degraded product

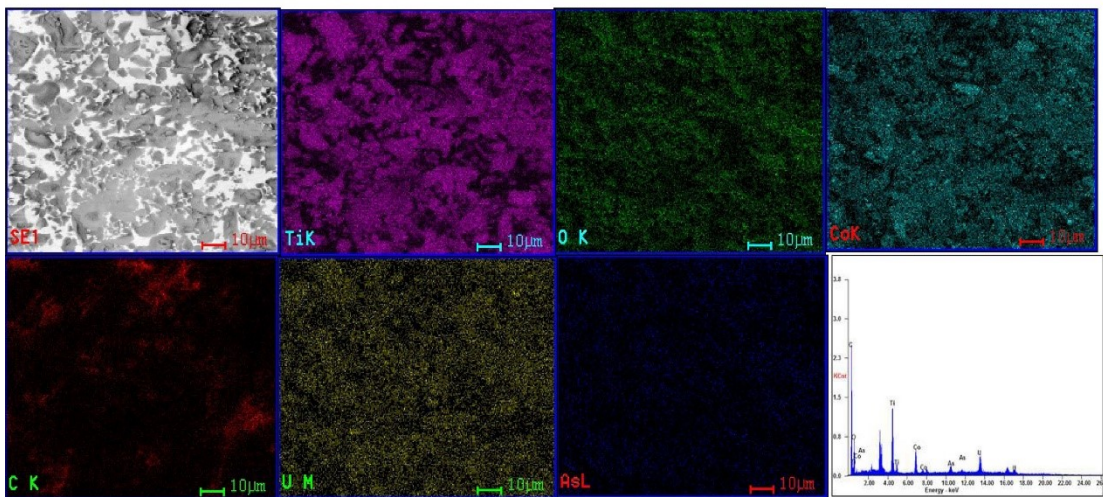

26

27 **Fig. S4** SEM, EdX and element mapping for U(VI)-ARZ3 complex degraded product.

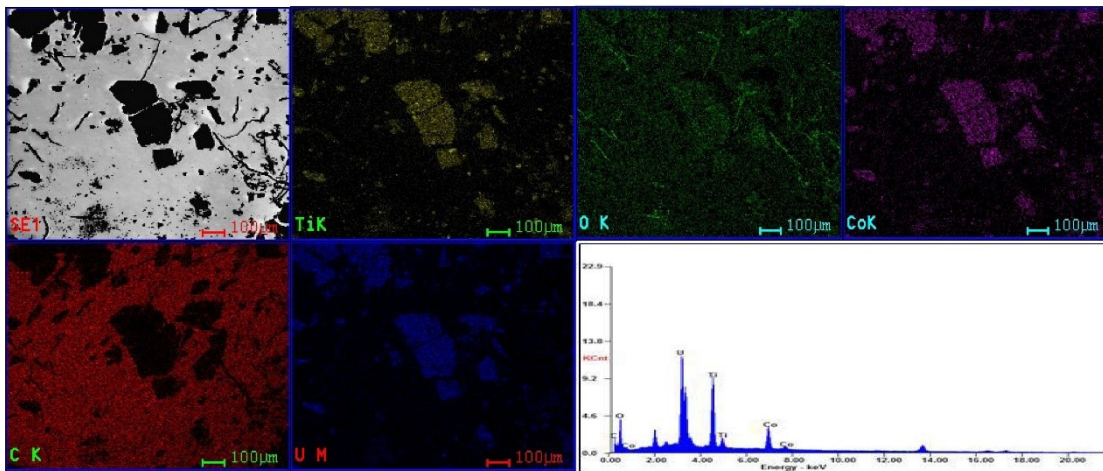

28



29 Fig. S5 SEM, EdX and element mapping for uranium degraded product in 10% ethanol media.

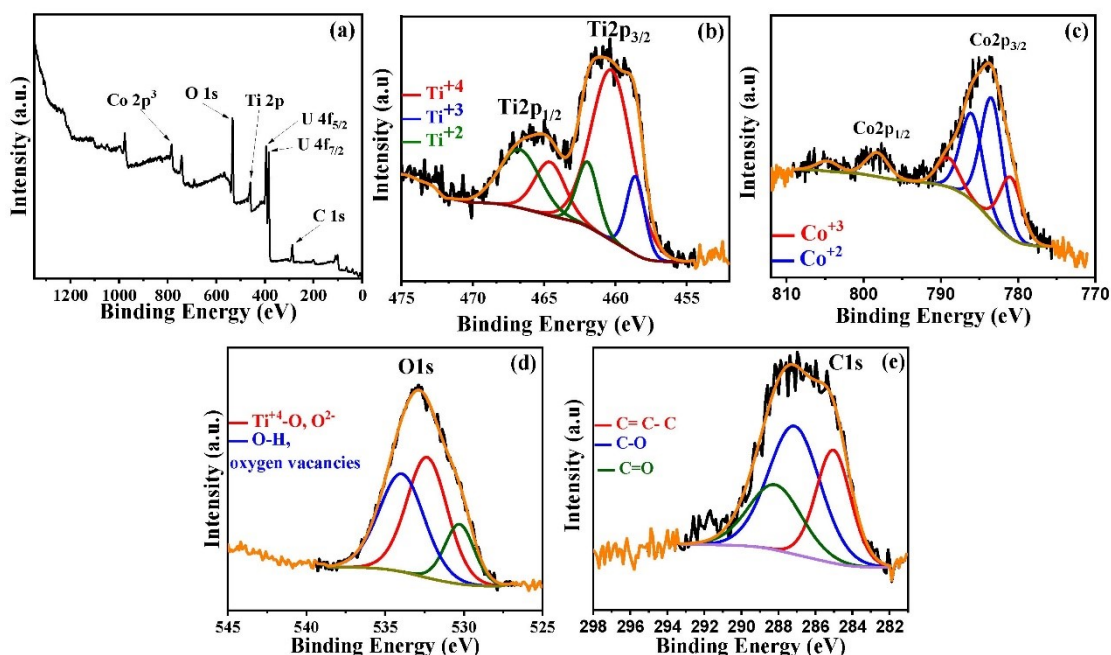

30  
31 Fig. S6 : XPS spectra of Co@TiO<sub>2</sub>-C after photocatalytic reduction of uranium in 10% ethanol.  
32 (a) Survey spectrum, (b) Ti 2p XPS spectra, (c) Co 2p XPS spectra, (d) O 1s XPS spectra and  
33 (e) C 1s XPS spectra.

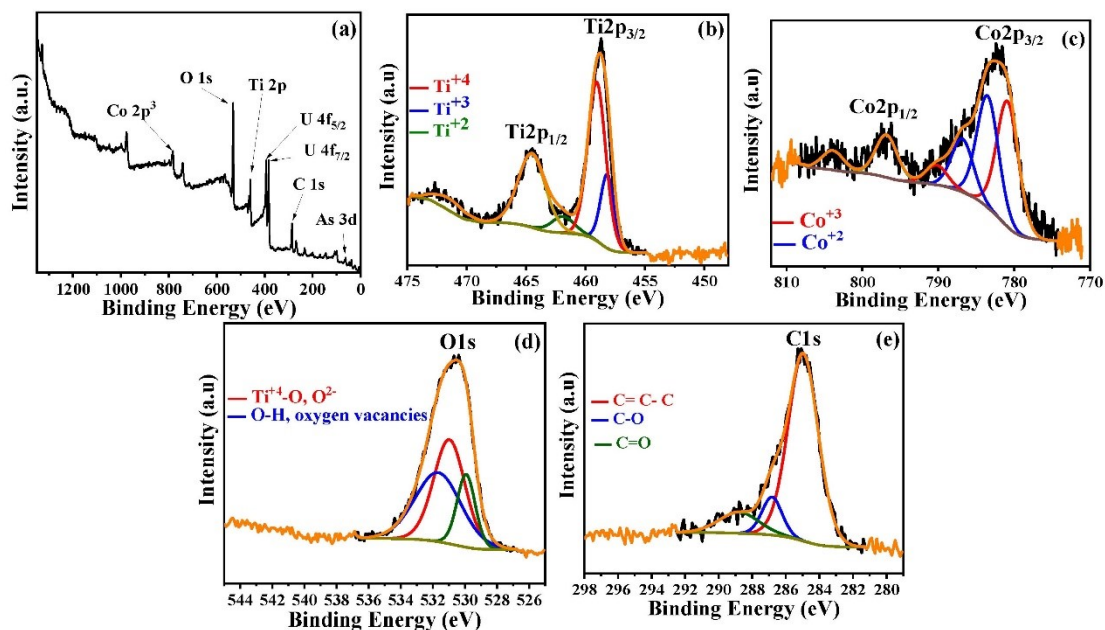

34  
35 Fig. S7 : XPS spectra of Co@TiO<sub>2</sub>-C after photocatalytic reduction of uranium in presence of  
36 arsenazo3. (a) Survey spectrum, (b) Ti 2p XPS spectra, (c) Co 2p XPS spectra, (d) O 1s XPS  
37 spectra and (e) C 1s XPS spectra.

38 Table S1: Pseudo- first-order parameters of Co@TiO<sub>2</sub>-C catalysts (0.1 g of 100 mg/L U(VI) in  
39 10 mL solution volum and (0.1 g of 50 mg/L arsenazo 3 in 10 mL solution volum).

| pH | U(VI) in H <sub>2</sub> O |                | U(VI) in 10% ethanol     |                | U(VI)+Arsenazo3          |                | Arsenazo3                |                |
|----|---------------------------|----------------|--------------------------|----------------|--------------------------|----------------|--------------------------|----------------|
|    | K                         | R <sup>2</sup> | K                        | R <sup>2</sup> | K                        | R <sup>2</sup> | K                        | R <sup>2</sup> |
| 2  | 8.6 x 10 <sup>-3</sup>    | 0.99           | 2.859 x 10 <sup>-2</sup> | 0.95           | 2.458 x 10 <sup>-2</sup> | 0.98           | 3.981 x 10 <sup>-2</sup> | 0.99           |
| 4  | 1.136 x 10 <sup>-2</sup>  | 0.98           | 4.017 x 10 <sup>-2</sup> | 0.97           | 3.57 x 10 <sup>-2</sup>  | 0.99           | 6.781 x 10 <sup>-2</sup> | 0.99           |

|   |                        |      |                        |      |                        |      |                        |      |
|---|------------------------|------|------------------------|------|------------------------|------|------------------------|------|
| 6 | $1.151 \times 10^{-2}$ | 0.96 | $9.97 \times 10^{-2}$  | 0.99 | $6.155 \times 10^{-2}$ | 0.99 | $4.956 \times 10^{-2}$ | 0.98 |
| 8 | $1.254 \times 10^{-2}$ | 0.97 | $4.579 \times 10^{-2}$ | 0.95 | $4.311 \times 10^{-2}$ | 0.98 | $2.839 \times 10^{-2}$ | 0.98 |

40 **Table S2:** Comparison of photocatalytic efficiency of Co@TiO<sub>2</sub>-C composites with other  
41 reported photocatalysts for uranium removal.

| Catalyst                                                    | Active Compound Target        | C <sub>0</sub> (mg/L)         | Efficacy (%)      | Time (min) | Ref.      |
|-------------------------------------------------------------|-------------------------------|-------------------------------|-------------------|------------|-----------|
| ZIF-8/g-C <sub>3</sub> N <sub>4</sub> (100mg)               | (100 ml) U(VI)                | 10                            | 90                | 60         | [S1]      |
| gC <sub>3</sub> N <sub>4</sub> /TiO <sub>2</sub> (200 mg)   | (50 ml) U(VI)                 | 10                            | 99                | 30         | [S2]      |
| g-C <sub>3</sub> N <sub>4</sub> /LaFeO <sub>3</sub> (30 mg) | (15 ml) U(VI)                 | 10                            | 96.7              | 120        | [S3]      |
| mGO/g-C <sub>3</sub> N <sub>4</sub> (50 mg)                 | (30 ml) U(VI)                 | 20                            | 96.02             | 30         | [S4]      |
| C <sub>3</sub> N <sub>5</sub> /RGO (10 mg)                  | (20 ml) U(VI)                 | 10                            | 94.9              | 100        | [S5]      |
| g-C <sub>3</sub> N <sub>4</sub> /TiO <sub>2</sub> (250 mg)  | (100 ml) U(VI),<br>As(III)    | 20<br>20                      | 82.66%,<br>41.18% | 240        | [S6]      |
| Sn-doped In <sub>2</sub> S <sub>3</sub> (150 mg)            | (100 ml) U(VI)                | 60                            | 90                | 60         | [S7]      |
| Fe <sub>2</sub> O <sub>3</sub> -GO (400 mg)                 | (100 ml) U(VI)                | 5                             | 76                | 180        | [S8]      |
| TiO <sub>2</sub> (001) (200 mg)                             | (10 ml) U(VI)                 | 24                            | 100               | 180        | [S9]      |
| Ti <sub>3</sub> C <sub>2</sub> /SrTiO <sub>3</sub> (330 mg) | (60 ml) U(VI)                 | 50                            | 77                | 180        | [S10]     |
| Nb/TiNFs (200 mg)                                           | (100 ml) U(VI)                | 50                            | 46.5              | 240        | [S11]     |
| ZnFe <sub>2</sub> O <sub>4</sub> (200 mg)                   | (12.5 ml) U(VI)               | 50                            | 95                | 40         | [S12]     |
| Co/TiO <sub>2</sub> @C (10 mg)                              | (10 ml) U(VI)                 | 1000                          | 96.4              | 60         | This work |
| Co/TiO <sub>2</sub> @C (10 mg)                              | (10 ml) U(VI)-ARZ3<br>complex | 100 U(VI)/<br>50<br>Arsenazo3 | 99.4              | 60         | This work |

42

43

#### 44 References

45 [S1] Qiu, M., Z. Liu, S. Wang, and B. Hu, The photocatalytic reduction of U (VI) into U (IV)  
46 by ZIF-8/g-C<sub>3</sub>N<sub>4</sub> composites at visible light. *Environmental Research*, 2021. **196**: p.  
47 110349.

48 [S2] Liu, Y., S. Wu, J. Liu, S. Xie, and Y. Liu, Synthesis of gC<sub>3</sub>N<sub>4</sub>/TiO<sub>2</sub> nanostructures for  
49 enhanced photocatalytic reduction of U (vi) in water. *RSC advances*, 2021. **11**(8): p.  
50 4810-4817.

51 [S3] Li, S., X. Yang, Z. Cui, Y. Xu, Z. Niu, P. Li, D. Pan, and W. Wu, Efficient photoreduction  
52 strategy for uranium immobilization based on graphite carbon nitride/perovskite oxide  
53 heterojunction nanocomposites. *Applied Catalysis B: Environmental*, 2021. **298**: p.  
54 120625.

55 [S4] Dai, Z., Y. Sun, H. Zhang, D. Ding, and L. Li, Photocatalytic reduction of U (VI) in  
56 wastewater by mGO/g-C<sub>3</sub>N<sub>4</sub> nanocomposite under visible LED light irradiation.  
57 *Chemosphere*, 2020. **254**: p. 126671.

58 [S5] Wu, L., X. Yang, T. Chen, Y. Li, Q. Meng, L. Zhu, W. Zhu, R. He, and T. Duan, Three-  
59 dimensional C<sub>3</sub>N<sub>5</sub>/RGO aerogels with enhanced visible-light response and electron-hole  
60 separation efficiency for photocatalytic uranium reduction. *Chemical Engineering*  
61 *Journal*, 2022. **427**: p. 131773.

62 [S6] Jiang, X.-H., Q.-J. Xing, X.-B. Luo, F. Li, J.-P. Zou, S.-S. Liu, X. Li, and X.-K. Wang,  
63 Simultaneous photoreduction of Uranium (VI) and photooxidation of Arsenic (III) in  
64 aqueous solution over g-C<sub>3</sub>N<sub>4</sub>/TiO<sub>2</sub> heterostructured catalysts under simulated sunlight  
65 irradiation. *Applied Catalysis B: Environmental*, 2018. **228**: p. 29-38.

- 66 [S7] Feng, J., Z. Yang, S. He, X. Niu, T. Zhang, A. Ding, H. Liang, and X. Feng,  
67 Photocatalytic reduction of Uranium (VI) under visible light with Sn-doped  $\text{In}_2\text{S}_3$   
68 microspheres. *Chemosphere*, 2018. **212**: p. 114-123.
- 69 [S8] Guo, Y., Y. Guo, X. Wang, P. Li, L. Kong, G. Wang, X. Li, and Y. Liu, Enhanced  
70 photocatalytic reduction activity of uranium (vi) from aqueous solution using the  $\text{Fe}_2\text{O}_3$ -  
71 graphene oxide nanocomposite. *Dalton Transactions*, 2017. **46**(43): p. 14762-14770.
- 72 [S9] Chen, K., C. Chen, X. Ren, A. Alsaedi, and T. Hayat, Interaction mechanism between  
73 different facet  $\text{TiO}_2$  and U (VI): experimental and density-functional theory  
74 investigation. *Chemical Engineering Journal*, 2019. **359**: p. 944-954.
- 75 [S10] Deng, H., Z.-j. Li, L. Wang, L.-y. Yuan, J.-h. Lan, Z.-y. Chang, Z.-f. Chai, and W.-q.  
76 Shi, Nanolayered  $\text{Ti}_3\text{C}_2$  and  $\text{SrTiO}_3$  composites for photocatalytic reduction and removal  
77 of uranium (VI). *ACS Applied Nano Materials*, 2019. **2**(4): p. 2283-2294.
- 78 [S11] Liu, X., P. Du, W. Pan, C. Dang, T. Qian, H. Liu, W. Liu, and D. Zhao, Immobilization  
79 of uranium (VI) by niobate/titanate nanoflakes heterojunction through combined  
80 adsorption and solar-light-driven photocatalytic reduction. *Applied Catalysis B:  
81 Environmental*, 2018. **231**: p. 11-22.
- 82 [S12] Liang, P.-l., L.-y. Yuan, H. Deng, X.-c. Wang, L. Wang, Z.-j. Li, S.-z. Luo, and W.-q.  
83 Shi, Photocatalytic reduction of uranium (VI) by magnetic  $\text{ZnFe}_2\text{O}_4$  under visible light.  
84 *Applied Catalysis B: Environmental*, 2020. **267**: p. 118688.

85

86

87

88

89
